# Supplementary material
Source: PubMed Central journal article supplement (PMC4868659)
Supplement: NIHMS770793-supplement-1.pdf [file NIHMS770793-supplement-1.pdf]

**Supplemental Table S1: *Staphylococcus aureus* strains**

| <b>Strain</b>                  | <b>Genotypes or characteristics</b>                                       | <b>Colony color</b> | <b>Resource or reference</b> |
|--------------------------------|---------------------------------------------------------------------------|---------------------|------------------------------|
| LAC13C                         | USA300, SCC <i>mecIV</i> , pvl <sup>+</sup>                               | Yellow              | (9)                          |
| LACJE2                         | USA300, SCC <i>mecIV</i> , pvl <sup>+</sup>                               | Yellow              | (9)                          |
| BAA 1695                       | (Non USA100 – 1100) MRSA, pvl <sup>-</sup>                                | White               | ATCC                         |
| MW2                            | USA400, MRSA                                                              | Yellow              | ATCC                         |
| NEWMAN                         | MSSA                                                                      | Yellow              | ATCC                         |
| BAA 1692                       | USA100 SCC <i>mecII</i> , Agr type II, pvl <sup>-</sup>                   | White               | ATCC                         |
| BAA 1750                       | USA200, pvl <sup>-</sup>                                                  | White               | ATCC                         |
| BAA 1760                       | USA200, pvl <sup>-</sup>                                                  | White               | ATCC                         |
| BAA 15565                      | MSSA                                                                      | Cream               | ATCC                         |
| BAA 29213                      | MSSA                                                                      | White               | ATCC                         |
| BAA 1556                       | USA300, SCC <i>mecIV</i> , pvl <sup>+</sup>                               | Cream               | ATCC                         |
| BAA 1696                       | USA400, SCC <i>mecIV</i> , pvl <sup>+</sup>                               | Yellow              | ATCC                         |
| HFH-30522                      | USA500, SCC <i>mecIV</i> , pvl <sup>-</sup>                               | Cream               | BEI                          |
| NRS70/N315                     | USA100, SCC <i>mecII</i> , pvl <sup>-</sup>                               | Yellow              | BEI                          |
| NRS668                         | USA800, SCC <i>mecIV</i> , pvl <sup>-</sup>                               | Cream               | BEI                          |
| NRS689                         | USA700, SCC <i>mecIV</i> , pvl <sup>-</sup>                               | Gray                | BEI                          |
| NRS715                         | USA600, SCC <i>mecIV</i> , pvl <sup>-</sup>                               | Gray                | BEI                          |
| NRS 484                        | USA1100, SCC <i>mecIV</i> , pvl <sup>+</sup>                              | Cream               | BEI                          |
| NRS 155<br>(502AΔ <i>agr</i> ) | MSSA                                                                      | Gray                | BEI                          |
| 502A                           | MSSA                                                                      | Gray                | (20)                         |
| NRS 385                        | USA500, SCC <i>mecIV</i> , pvl <sup>-</sup>                               | Yellow              | BEI                          |
| NRS 686                        | USA500, SCC <i>mecIV</i> , pvl <sup>-</sup>                               | Yellow              | BEI                          |
| NRS 483                        | USA1000, SCC <i>mecIV</i> , pvl <sup>+</sup> , enterotoxin B <sup>+</sup> | Yellow              | BEI                          |

**Supplemental Table S2: Mutant strains**

| <b>Strain Number</b>       | <b>Gene Symbol</b> | <b>Gene Disrupted</b>                                       | <b>Resource or reference</b> |
|----------------------------|--------------------|-------------------------------------------------------------|------------------------------|
| NE1354                     | <i>hla</i>         | Alpha-hemolysin precursor (41, 42)                          | (9)                          |
| NE1532                     | <i>agrA</i>        | Accessory gene regulator protein A (43, 44)                 | (9)                          |
| NE1787                     | <i>srtA</i>        | Sortase (45, 46)                                            | (9)                          |
| NE1366                     | <i>kata</i>        | Catalase (47)                                               | (9)                          |
| NE1444                     | <i>crtM</i>        | Squalene desaturase (12, 13)                                | (9)                          |
| NE1929                     | <i>dps</i>         | General stress protein 20U (48)                             | (9)                          |
| NE1848                     | <i>pvl</i>         | Panton-Valentine leukocidin, LukS-PV (49, 50)               | (9)                          |
| NE518                      | <i>crtQ</i>        | 4,4'-diaponeurosporenoate glycosyl transferase              | (9)                          |
| NE1224                     | <i>sod</i>         | Fe/Mn family superoxide dismutase (51)                      | (9)                          |
| NE1622                     | <i>saeR</i>        | Response regulator SaeR (52, 53)                            | (9)                          |
| NE1684                     | <i>arlR</i>        | Response regulator arlR (54)                                | (9)                          |
| NE1193                     | <i>sarA</i>        | Staphylococcal accessory regulator A (55)                   | (9)                          |
| NE543                      | <i>clfA</i>        | Clumping Factor A (56, 57)                                  | (9)                          |
| NE302                      | <i>cap5a</i>       | Capsular polysaccharide biosynthesis protein Cap5A (58, 59) | (9)                          |
| NE295                      | <i>adsA</i>        | Adenosine synthase A (60)                                   | (9)                          |
| NE911                      | <i>ahpC</i>        | Alkyl hydroperoxide reductase subunit C (47)                | (9)                          |
| NE1373                     | <i>oatA</i>        | O-acetyltransferase (61)                                    | (9)                          |
| LAC13C $\Delta$ <i>psm</i> | <i>psm</i>         | Phenol soluble modulins (55)                                | (16)                         |
| LAC13C<br><i>spa:kan</i>   | <i>spa</i>         | Surface protein A                                           | (62)                         |

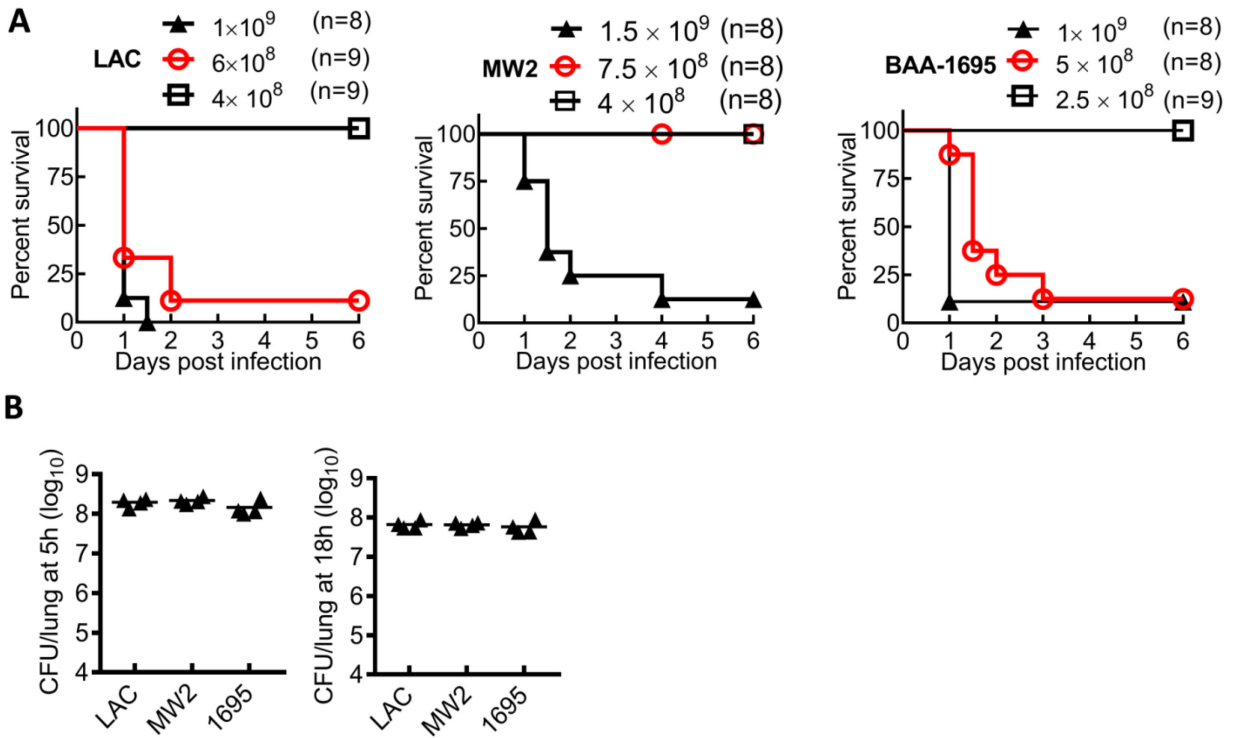

**Supplemental Figure S1. The pathogenic success of prevalent CA-MRSA strains is not associated with their lethality in mice.** (A) Survival of C57BL/6 mice after intranasal (i.n.) infection with high doses of LAC-JE2 (LAC), MW2 or BAA-1695. Data shown were combined from two independent experiments. (B) Numbers of bacteria remaining in the lungs 5 and 18 h after i.n. infection with  $5 \times 10^8$  CFU/mouse *S. aureus*. Data shown are representative of two independent experiments.

**A**

| Time (min) | -lysostaphin (cfu/100 MHS) | +lysostaphin (cfu/100 MHS) |
|------------|----------------------------|----------------------------|
| 0          | 510                        | 0                          |
| 60         | 770                        | 860                        |

**B**

| Time (min) | -lysostaphin (cfu/100 MHS) | +lysostaphin (cfu/100 MHS) |
|------------|----------------------------|----------------------------|
| 0          | 530                        | 3                          |
| 60         | 520                        | 540                        |

**C**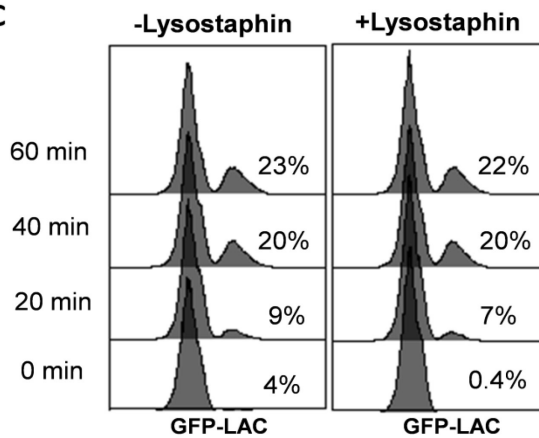**D**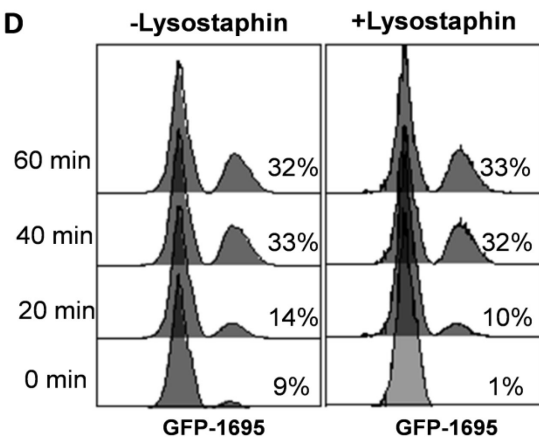

**Supplemental Figure S2. Alveolar macrophages are efficient in *S. aureus* uptake.** Numbers of (A) GFP-LAC-JE2 and (B) GFP-1695 associated with MH-S cells, and (C-D) kinetics of GFP-LAC-JE2 (GFP-LAC) (C) and GFP-1695 (D) internalization by MH-S cells at 37°C. MH-S cells were inoculated with *S. aureus* at MOI 10 and co-incubated for 60 min on ice, allowing bacteria binding onto the cells, before further incubation at 37°C. At various time points, i.e., 0, 20, 40, and 60 min, extracellular bacteria were lysed by adding 20ug/ml of lysostaphin and incubating the cell cultures for 10 min at 37 °C. Data shown are representative of two independent experiments.
